# Supplementary material for: Rapid and Local Self-Healing Ability of Polyurethane Nanocomposites Using Photothermal Polydopamine-Coated Graphene Oxide Triggered by Near-Infrared Laser
Source: MDPI journal article supplement (doi:10.3390/polym13081274), 2021-04-14
Supplement: s1 [file s1]

# Rapid and Local Self-healing Ability of Polyurethane Nanocomposites using Photothermal Polydopamine-Coated Graphene Oxide Triggered by Near-Infrared Laser

Yu-Mi Ha <sup>1,†</sup>, Young Nam Kim <sup>1,†</sup> and Yong Chae Jung <sup>1,\*</sup>

<sup>1</sup> Institute of Advanced Composite Materials, Korea Institute of Science and Technology, 92 Chudong-ro, Bongdong-eup, Wanju-gun, Jeollabuk-Do 55324, Republic of Korea; yumih87@gmail.com

<sup>†</sup> These authors contributed equally.

<sup>\*</sup> Correspondence: ycjung@kist.re.kr; Tel.: +82 (63) 219-8153

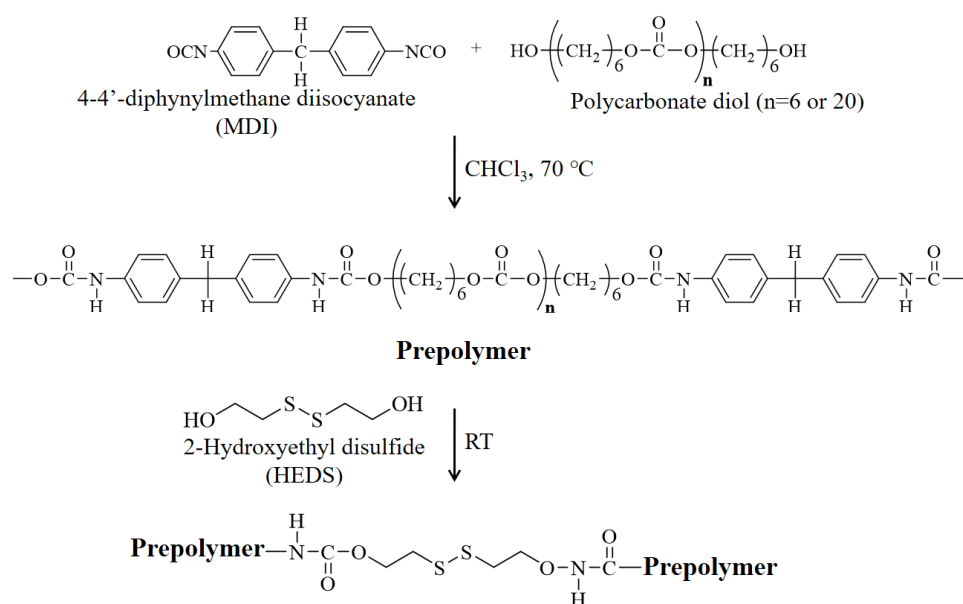

**Scheme S1.** Synthetic procedure of polyurethane with disulfide bonds.

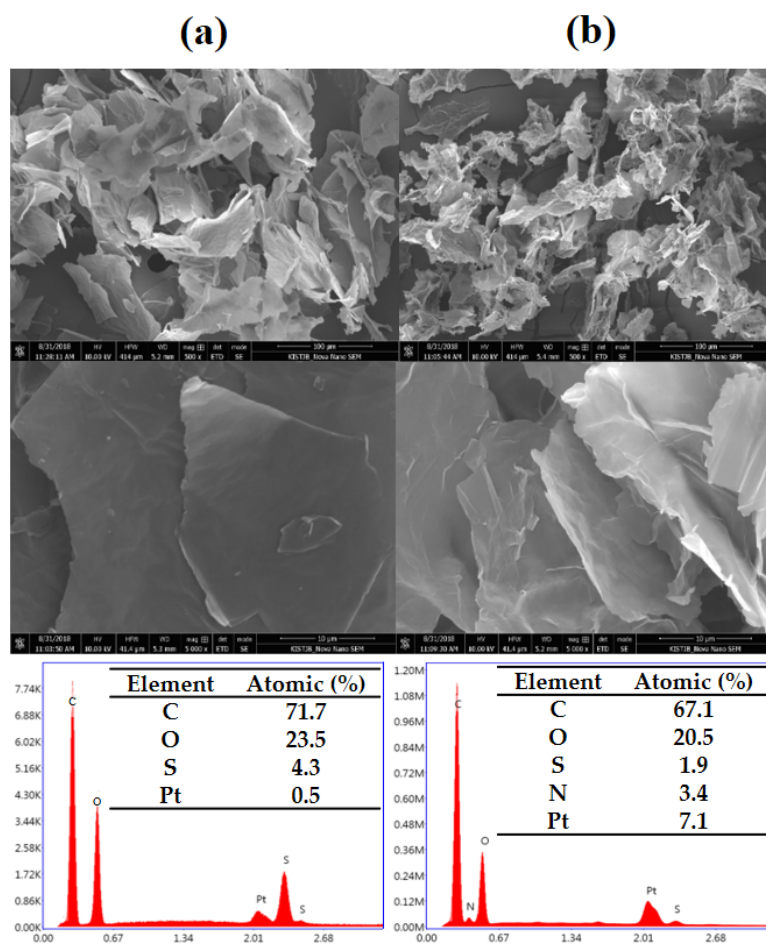

**Figure S1.** FE-SEM images and EDX of (a) GO, and (b) PDA-rGO powders.

**(a) GO in  $\text{CHCl}_3$**

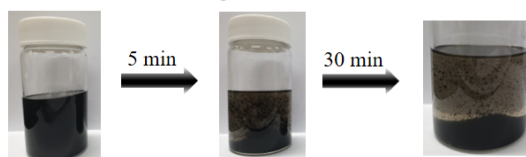

**(b) PDA-rGO in  $\text{CHCl}_3$**

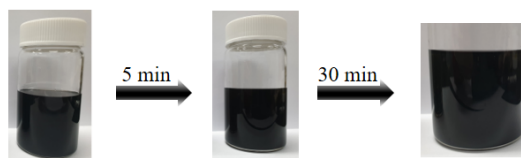

**Figure S2.** Photo images showing dispersion stability of (a) GO, and (b) PDA-rGO in chloroform.

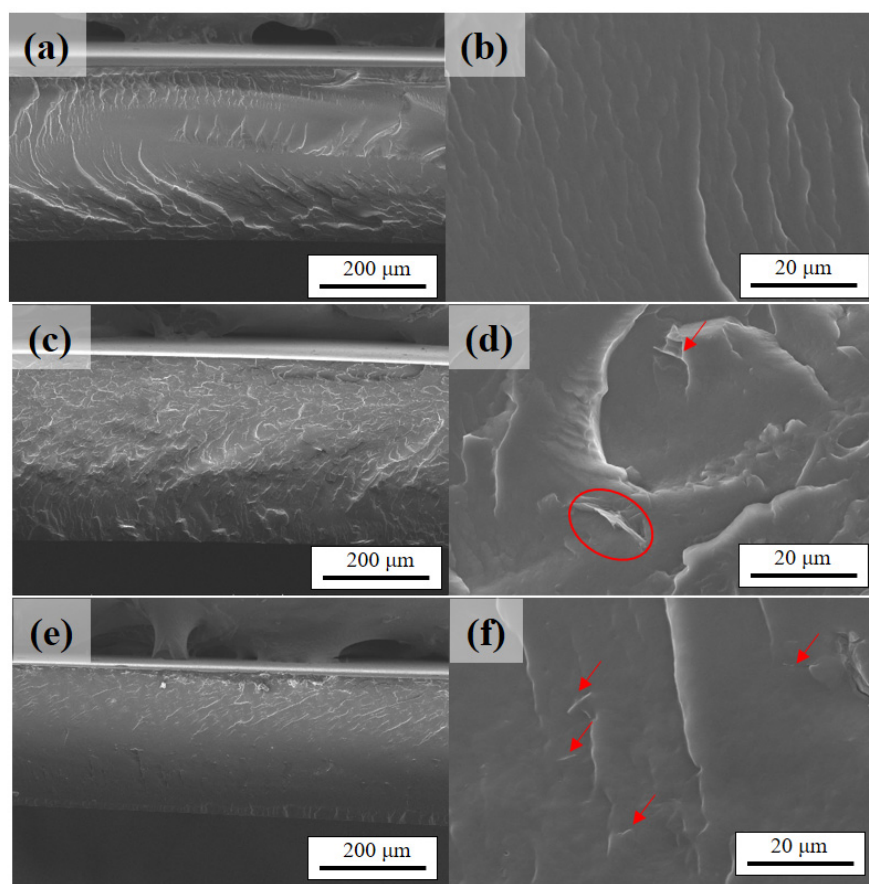

**Figure S3.** FE-SEM images of (a-b) PU, (c-d) 1 wt% GO/PU, and (e-f) 1 wt% PDA-rGO/PU nano-composites.
